# Supplementary material for: Theoretical and experimental investigations on stability and chemistry of organoiridium(iii) complexes
Source: Royal Society of Chemistry journal article supplement (doi:10.1039/c5ra27350a), 2016-01-01
Supplement: c5ra27350a1.pdf [file c5ra27350a1.pdf]

## Supporting information

### Optimized Coordinates of A-H

#### A

Standard orientation

| Center<br>Number | Atomic<br>Number | Atomic<br>Type | Coordinates (Angstroms) |           |           |
|------------------|------------------|----------------|-------------------------|-----------|-----------|
|                  |                  |                | X                       | Y         | Z         |
| 1                | 6                | 0              | -0.191096               | -1.961088 | -1.454745 |
| 2                | 6                | 0              | -0.193868               | -1.988660 | 1.406127  |
| 3                | 1                | 0              | 0.280843                | -1.594536 | -2.377740 |
| 4                | 1                | 0              | 0.384692                | -2.824699 | -1.099106 |
| 5                | 1                | 0              | 0.084466                | -1.598845 | 2.396188  |
| 6                | 1                | 0              | 0.544148                | -2.747009 | 1.122821  |
| 7                | 77               | 0              | -0.442148               | -0.438289 | -0.008445 |
| 8                | 1                | 0              | -1.155144               | -2.509569 | 1.513141  |
| 9                | 1                | 0              | -1.185581               | -2.341521 | -1.723996 |
| 10               | 15               | 0              | 1.816614                | -0.089930 | 0.000124  |
| 11               | 6                | 0              | -2.707955               | -0.241876 | -0.012160 |
| 12               | 6                | 0              | -2.253918               | 0.456464  | 1.173058  |
| 13               | 6                | 0              | -2.253116               | 0.516472  | -1.160958 |
| 14               | 6                | 0              | -1.480491               | 1.579397  | 0.763132  |
| 15               | 6                | 0              | -1.482937               | 1.617854  | -0.692419 |
| 16               | 6                | 0              | -0.928684               | 2.736003  | -1.530068 |
| 17               | 1                | 0              | -1.648508               | 3.562776  | -1.619305 |
| 18               | 1                | 0              | -0.014561               | 3.157068  | -1.097551 |
| 19               | 1                | 0              | -0.691265               | 2.403134  | -2.545355 |
| 20               | 6                | 0              | -0.932158               | 2.653964  | 1.660828  |
| 21               | 1                | 0              | -1.685227               | 3.430816  | 1.858825  |
| 22               | 1                | 0              | -0.614916               | 2.253860  | 2.629036  |
| 23               | 1                | 0              | -0.067988               | 3.154846  | 1.212880  |
| 24               | 6                | 0              | -2.610816               | 0.092996  | 2.585482  |
| 25               | 1                | 0              | -3.613510               | 0.461568  | 2.843295  |
| 26               | 1                | 0              | -2.609581               | -0.990821 | 2.736114  |
| 27               | 1                | 0              | -1.906290               | 0.525273  | 3.302567  |
| 28               | 6                | 0              | -3.678882               | -1.387500 | -0.041508 |
| 29               | 1                | 0              | -4.721460               | -1.037515 | -0.031236 |
| 30               | 1                | 0              | -3.548656               | -1.999347 | -0.940054 |
| 31               | 1                | 0              | -3.547122               | -2.045831 | 0.823409  |
| 32               | 6                | 0              | -2.616992               | 0.227461  | -2.588934 |
| 33               | 1                | 0              | -3.620032               | 0.611370  | -2.822303 |
| 34               | 1                | 0              | -1.914994               | 0.693216  | -3.287143 |
| 35               | 1                | 0              | -2.621832               | -0.847029 | -2.795344 |
| 36               | 6                | 0              | 2.407501                | 0.781347  | -1.551035 |
| 37               | 6                | 0              | 3.708871                | 1.596575  | -1.545617 |
| 38               | 1                | 0              | 1.574081                | 1.435495  | -1.826049 |
| 39               | 1                | 0              | 2.439721                | 0.006574  | -2.327997 |
| 40               | 1                | 0              | 3.865635                | 2.053562  | -2.530622 |
| 41               | 1                | 0              | 3.669022                | 2.410601  | -0.813825 |

|    |   |   |          |           |           |
|----|---|---|----------|-----------|-----------|
| 42 | 1 | 0 | 4.588621 | 0.987277  | -1.322410 |
| 43 | 6 | 0 | 2.372017 | 0.990027  | 1.428479  |
| 44 | 6 | 0 | 3.831392 | 0.960877  | 1.905441  |
| 45 | 1 | 0 | 1.712689 | 0.699558  | 2.254343  |
| 46 | 1 | 0 | 2.080328 | 2.013713  | 1.162780  |
| 47 | 1 | 0 | 3.957864 | 1.641574  | 2.756473  |
| 48 | 1 | 0 | 4.123953 | -0.038265 | 2.244374  |
| 49 | 1 | 0 | 4.534577 | 1.271971  | 1.128041  |
| 50 | 6 | 0 | 2.861628 | -1.634932 | 0.133477  |
| 51 | 6 | 0 | 4.307635 | -1.632789 | -0.381135 |
| 52 | 1 | 0 | 2.292074 | -2.400367 | -0.400497 |
| 53 | 1 | 0 | 2.832976 | -1.927403 | 1.190014  |
| 54 | 1 | 0 | 4.747208 | -2.628927 | -0.247197 |
| 55 | 1 | 0 | 4.354998 | -1.401246 | -1.450226 |
| 56 | 1 | 0 | 4.946205 | -0.919667 | 0.147427  |

## B

Standard orientation

| Center<br>Number | Atomic<br>Number | Atomic<br>Type | Coordinates (Angstroms) |           |           |
|------------------|------------------|----------------|-------------------------|-----------|-----------|
|                  |                  |                | X                       | Y         | Z         |
| 1                | 77               | 0              | 0.341318                | -0.004615 | -0.021598 |
| 2                | 15               | 0              | -1.940101               | 0.228545  | -0.049467 |
| 3                | 6                | 0              | 2.412629                | -1.018765 | 0.347839  |
| 4                | 6                | 0              | 1.498058                | -1.634963 | 1.294384  |
| 5                | 6                | 0              | 1.989126                | -1.405142 | -0.972759 |
| 6                | 6                | 0              | 0.515812                | -2.345604 | 0.549437  |
| 7                | 6                | 0              | 0.807381                | -2.197251 | -0.861898 |
| 8                | 6                | 0              | 0.160848                | -2.948718 | -1.992172 |
| 9                | 1                | 0              | 0.701514                | -3.881865 | -2.211799 |
| 10               | 1                | 0              | -0.872838               | -3.225198 | -1.763994 |
| 11               | 1                | 0              | 0.149805                | -2.359749 | -2.915629 |
| 12               | 6                | 0              | -0.527331               | -3.266821 | 1.117863  |
| 13               | 1                | 0              | -0.169904               | -4.306459 | 1.113033  |
| 14               | 1                | 0              | -0.772560               | -3.017491 | 2.154584  |
| 15               | 1                | 0              | -1.457765               | -3.248765 | 0.539966  |
| 16               | 6                | 0              | 1.673095                | -1.680244 | 2.786645  |
| 17               | 1                | 0              | 2.314060                | -2.523138 | 3.084601  |
| 18               | 1                | 0              | 2.140034                | -0.769184 | 3.169724  |
| 19               | 1                | 0              | 0.716254                | -1.799328 | 3.304943  |
| 20               | 6                | 0              | 3.740617                | -0.402459 | 0.690465  |
| 21               | 1                | 0              | 4.529960                | -1.167733 | 0.731552  |
| 22               | 1                | 0              | 4.045882                | 0.344352  | -0.048843 |
| 23               | 1                | 0              | 3.717116                | 0.094979  | 1.662743  |
| 24               | 6                | 0              | 2.731126                | -1.159294 | -2.255263 |
| 25               | 1                | 0              | 3.211202                | -2.085736 | -2.600025 |
| 26               | 1                | 0              | 2.066180                | -0.819107 | -3.056540 |
| 27               | 1                | 0              | 3.517348                | -0.410455 | -2.134719 |
| 28               | 6                | 0              | -2.687879               | -0.300886 | 1.586766  |
| 29               | 6                | 0              | -4.124562               | -0.838165 | 1.652393  |
| 30               | 1                | 0              | -2.568243               | 0.559658  | 2.256450  |
| 31               | 1                | 0              | -1.999239               | -1.062115 | 1.964477  |
| 32               | 1                | 0              | -4.364421               | -1.128215 | 2.682793  |

|    |   |   |           |           |           |
|----|---|---|-----------|-----------|-----------|
| 33 | 1 | 0 | -4.867217 | -0.100180 | 1.338272  |
| 34 | 1 | 0 | -4.250311 | -1.729207 | 1.027883  |
| 35 | 6 | 0 | -2.750673 | -0.838767 | -1.359631 |
| 36 | 6 | 0 | -4.180839 | -0.539712 | -1.831332 |
| 37 | 1 | 0 | -2.068290 | -0.779845 | -2.214815 |
| 38 | 1 | 0 | -4.465737 | -1.248620 | -2.618558 |
| 39 | 1 | 0 | -4.917233 | -0.627172 | -1.028158 |
| 40 | 1 | 0 | -4.262534 | 0.465539  | -2.257121 |
| 41 | 6 | 0 | -2.624701 | 1.944619  | -0.360743 |
| 42 | 6 | 0 | -4.013331 | 2.314154  | 0.179801  |
| 43 | 1 | 0 | -2.589961 | 2.095775  | -1.446098 |
| 44 | 1 | 0 | -1.883237 | 2.628907  | 0.060614  |
| 45 | 1 | 0 | -4.232217 | 3.361963  | -0.059784 |
| 46 | 1 | 0 | -4.812729 | 1.706161  | -0.252372 |
| 47 | 1 | 0 | -4.063776 | 2.215474  | 1.268903  |
| 48 | 6 | 0 | 0.497517  | 1.399931  | -1.616775 |
| 49 | 6 | 0 | 1.776791  | 2.246026  | -1.676172 |
| 50 | 1 | 0 | -0.347854 | 2.098538  | -1.631427 |
| 51 | 1 | 0 | 0.420394  | 0.814490  | -2.548157 |
| 52 | 6 | 0 | 1.853310  | 3.123420  | -2.936879 |
| 53 | 1 | 0 | 1.836050  | 2.893913  | -0.793460 |
| 54 | 1 | 0 | 2.664780  | 1.603186  | -1.639056 |
| 55 | 1 | 0 | 2.768679  | 3.729322  | -2.954408 |
| 56 | 1 | 0 | 1.840670  | 2.511303  | -3.848049 |
| 57 | 1 | 0 | 0.998629  | 3.810109  | -2.991950 |
| 58 | 6 | 0 | 0.358542  | 1.711362  | 1.268861  |
| 59 | 6 | 0 | 1.669298  | 2.057664  | 1.985024  |
| 60 | 1 | 0 | -0.413138 | 1.599534  | 2.048373  |
| 61 | 1 | 0 | 0.069025  | 2.595121  | 0.681621  |
| 62 | 6 | 0 | 1.574252  | 3.358401  | 2.799775  |
| 63 | 1 | 0 | 1.954886  | 1.244054  | 2.663135  |
| 64 | 1 | 0 | 2.484915  | 2.153413  | 1.258102  |
| 65 | 1 | 0 | 2.516481  | 3.583430  | 3.316517  |
| 66 | 1 | 0 | 1.337048  | 4.212412  | 2.152452  |
| 67 | 1 | 0 | 0.784502  | 3.293070  | 3.559537  |
| 68 | 1 | 0 | -2.680688 | -1.870659 | -0.994007 |

## C

Standard orientation

| Center<br>Number | Atomic<br>Number | Atomic<br>Type | Coordinates (Angstroms) |           |           |
|------------------|------------------|----------------|-------------------------|-----------|-----------|
|                  |                  |                | X                       | Y         | Z         |
| 1                | 77               | 0              | 0.427676                | -0.346065 | -0.056712 |
| 2                | 15               | 0              | -1.909282               | 0.100455  | 0.011928  |
| 3                | 6                | 0              | 2.704760                | -0.094268 | -0.065919 |
| 4                | 6                | 0              | 2.180666                | 0.752463  | -1.112549 |
| 5                | 6                | 0              | 2.221792                | 0.414553  | 1.202867  |
| 6                | 6                | 0              | 1.320302                | 1.724229  | -0.512643 |
| 7                | 6                | 0              | 1.350629                | 1.514536  | 0.940133  |
| 8                | 6                | 0              | 0.832654                | 2.455411  | 1.991032  |
| 9                | 1                | 0              | 1.641841                | 3.121109  | 2.319732  |
| 10               | 1                | 0              | 0.028908                | 3.095921  | 1.623147  |
| 11               | 1                | 0              | 0.467015                | 1.922853  | 2.873188  |

|    |   |   |           |           |           |
|----|---|---|-----------|-----------|-----------|
| 12 | 6 | 0 | 0.771493  | 2.923465  | -1.232029 |
| 13 | 1 | 0 | 1.578086  | 3.648430  | -1.404297 |
| 14 | 1 | 0 | 0.355995  | 2.657154  | -2.207895 |
| 15 | 1 | 0 | -0.003662 | 3.435581  | -0.661105 |
| 16 | 6 | 0 | 2.551011  | 0.689994  | -2.564608 |
| 17 | 1 | 0 | 3.430372  | 1.321625  | -2.749737 |
| 18 | 1 | 0 | 2.807763  | -0.324036 | -2.881311 |
| 19 | 1 | 0 | 1.743645  | 1.052427  | -3.205619 |
| 20 | 6 | 0 | 3.765561  | -1.142782 | -0.240605 |
| 21 | 1 | 0 | 4.761128  | -0.680686 | -0.220664 |
| 22 | 1 | 0 | 3.743993  | -1.889183 | 0.558524  |
| 23 | 1 | 0 | 3.674150  | -1.667997 | -1.195925 |
| 24 | 6 | 0 | 2.645696  | -0.060543 | 2.560898  |
| 25 | 1 | 0 | 3.541169  | 0.487947  | 2.882973  |
| 26 | 1 | 0 | 1.867398  | 0.107307  | 3.309257  |
| 27 | 1 | 0 | 2.897014  | -1.124027 | 2.565935  |
| 28 | 6 | 0 | -0.196812 | -2.453467 | -0.334906 |
| 29 | 6 | 0 | 0.530016  | -2.381396 | 0.878011  |
| 30 | 6 | 0 | 0.368019  | -1.990717 | -1.554563 |
| 31 | 1 | 0 | 1.414679  | -2.184163 | -1.770479 |
| 32 | 1 | 0 | -0.271943 | -1.922466 | -2.428603 |
| 33 | 1 | 0 | 1.593823  | -2.598375 | 0.882798  |
| 34 | 1 | 0 | 0.018833  | -2.586604 | 1.812351  |
| 35 | 6 | 0 | -2.310364 | 1.926531  | 0.019400  |
| 36 | 6 | 0 | -3.662209 | 2.397091  | 0.581832  |
| 37 | 1 | 0 | -2.193849 | 2.255723  | -1.020305 |
| 38 | 1 | 0 | -1.516188 | 2.413189  | 0.585385  |
| 39 | 1 | 0 | -3.750518 | 3.478803  | 0.432411  |
| 40 | 1 | 0 | -4.519558 | 1.929198  | 0.093167  |
| 41 | 1 | 0 | -3.740326 | 2.211282  | 1.656907  |
| 42 | 6 | 0 | -2.894780 | -0.539300 | 1.463114  |
| 43 | 6 | 0 | -3.077408 | -2.056579 | 1.602808  |
| 44 | 1 | 0 | -3.881346 | -0.069112 | 1.400504  |
| 45 | 1 | 0 | -2.412095 | -0.132376 | 2.359890  |
| 46 | 1 | 0 | -3.737723 | -2.265561 | 2.450980  |
| 47 | 1 | 0 | -3.544696 | -2.499146 | 0.716176  |
| 48 | 1 | 0 | -2.136011 | -2.576954 | 1.793077  |
| 49 | 6 | 0 | -2.791859 | -0.533862 | -1.506157 |
| 50 | 6 | 0 | -4.302038 | -0.286453 | -1.635635 |
| 51 | 1 | 0 | -2.595074 | -1.609222 | -1.571298 |
| 52 | 1 | 0 | -2.258365 | -0.081017 | -2.351161 |
| 53 | 1 | 0 | -4.679436 | -0.799222 | -2.526890 |
| 54 | 1 | 0 | -4.861987 | -0.670308 | -0.776764 |
| 55 | 1 | 0 | -4.535199 | 0.775350  | -1.749731 |
| 56 | 1 | 0 | -1.262444 | -2.646713 | -0.289613 |

## D

Standard orientation

| Center<br>Number | Atomic<br>Number | Atomic<br>Type | Coordinates (Angstroms) |           |           |
|------------------|------------------|----------------|-------------------------|-----------|-----------|
|                  |                  |                | X                       | Y         | Z         |
| 1                | 77               | 0              | 0.265952                | -0.346514 | 0.102862  |
| 2                | 15               | 0              | 1.832698                | 1.297526  | -0.217977 |

|    |   |   |           |           |           |
|----|---|---|-----------|-----------|-----------|
| 3  | 6 | 0 | -0.651993 | -2.486476 | 0.197414  |
| 4  | 6 | 0 | 0.381285  | -2.551604 | -0.822155 |
| 5  | 6 | 0 | 0.005880  | -2.256978 | 1.459313  |
| 6  | 6 | 0 | 1.634228  | -2.320074 | -0.190502 |
| 7  | 6 | 0 | 1.407067  | -2.128693 | 1.228909  |
| 8  | 6 | 0 | 2.462349  | -2.074664 | 2.298571  |
| 9  | 1 | 0 | 2.667871  | -3.076454 | 2.704744  |
| 10 | 1 | 0 | 3.410968  | -1.684602 | 1.918551  |
| 11 | 1 | 0 | 2.158506  | -1.443736 | 3.140545  |
| 12 | 6 | 0 | 2.985119  | -2.455332 | -0.835758 |
| 13 | 1 | 0 | 3.394776  | -3.462380 | -0.671863 |
| 14 | 1 | 0 | 2.937364  | -2.301599 | -1.918160 |
| 15 | 1 | 0 | 3.714538  | -1.746033 | -0.428917 |
| 16 | 6 | 0 | 0.186958  | -2.982180 | -2.249219 |
| 17 | 1 | 0 | 0.312513  | -4.070095 | -2.351427 |
| 18 | 1 | 0 | -0.813939 | -2.738389 | -2.613761 |
| 19 | 1 | 0 | 0.906749  | -2.506160 | -2.923373 |
| 20 | 6 | 0 | -2.077057 | -2.935332 | 0.029079  |
| 21 | 1 | 0 | -2.169430 | -4.018583 | 0.197534  |
| 22 | 1 | 0 | -2.747314 | -2.436771 | 0.735802  |
| 23 | 1 | 0 | -2.453095 | -2.727242 | -0.975268 |
| 24 | 6 | 0 | -0.639744 | -2.289868 | 2.814448  |
| 25 | 1 | 0 | -0.499789 | -3.274619 | 3.282130  |
| 26 | 1 | 0 | -0.208652 | -1.543427 | 3.489786  |
| 27 | 1 | 0 | -1.715058 | -2.106028 | 2.757458  |
| 28 | 6 | 0 | 2.707631  | 1.082162  | -1.864410 |
| 29 | 6 | 0 | 4.139611  | 1.598168  | -2.066635 |
| 30 | 1 | 0 | 2.034514  | 1.519569  | -2.612220 |
| 31 | 1 | 0 | 2.685472  | 0.004060  | -2.047593 |
| 32 | 1 | 0 | 4.482138  | 1.347873  | -3.078312 |
| 33 | 1 | 0 | 4.219870  | 2.682207  | -1.952511 |
| 34 | 1 | 0 | 4.839147  | 1.132047  | -1.364520 |
| 35 | 6 | 0 | 3.173505  | 1.270646  | 1.089924  |
| 36 | 6 | 0 | 4.066324  | 2.499546  | 1.311963  |
| 37 | 1 | 0 | 2.639511  | 1.037067  | 2.018005  |
| 38 | 1 | 0 | 4.761946  | 2.306383  | 2.137825  |
| 39 | 1 | 0 | 4.663229  | 2.750974  | 0.431466  |
| 40 | 1 | 0 | 3.478068  | 3.381602  | 1.584604  |
| 41 | 6 | 0 | 1.231826  | 3.073307  | -0.221600 |
| 42 | 6 | 0 | 2.017770  | 4.132863  | -1.007528 |
| 43 | 1 | 0 | 1.149793  | 3.370262  | 0.830640  |
| 44 | 1 | 0 | 0.207150  | 3.033444  | -0.601433 |
| 45 | 1 | 0 | 1.510741  | 5.101825  | -0.923736 |
| 46 | 1 | 0 | 3.038469  | 4.263924  | -0.638003 |
| 47 | 1 | 0 | 2.072425  | 3.888731  | -2.073417 |
| 48 | 6 | 0 | -0.731346 | 0.899753  | 1.519357  |
| 49 | 6 | 0 | -2.255962 | 0.764607  | 1.623377  |
| 50 | 1 | 0 | -0.516937 | 1.961020  | 1.344438  |
| 51 | 1 | 0 | -0.286021 | 0.660743  | 2.498883  |
| 52 | 6 | 0 | -2.852362 | 1.615158  | 2.771588  |
| 53 | 1 | 0 | -2.730333 | 1.078039  | 0.686597  |
| 54 | 1 | 0 | -2.547666 | -0.282797 | 1.775531  |
| 55 | 1 | 0 | -2.395876 | 1.290809  | 3.720129  |
| 56 | 1 | 0 | -2.568718 | 2.667535  | 2.632624  |
| 57 | 6 | 0 | -0.895084 | 0.679030  | -1.377807 |
| 58 | 6 | 0 | -2.142286 | -0.029748 | -1.918050 |
| 59 | 1 | 0 | -0.259831 | 0.925712  | -2.244297 |

|    |   |   |           |           |           |
|----|---|---|-----------|-----------|-----------|
| 60 | 1 | 0 | -1.224237 | 1.641472  | -0.961247 |
| 61 | 6 | 0 | -2.973559 | 0.865279  | -2.869594 |
| 62 | 1 | 0 | -1.857899 | -0.938051 | -2.464408 |
| 63 | 1 | 0 | -2.791714 | -0.351430 | -1.096093 |
| 64 | 1 | 0 | -3.315125 | 1.757197  | -2.327304 |
| 65 | 1 | 0 | -2.315015 | 1.220987  | -3.677872 |
| 66 | 1 | 0 | 3.788835  | 0.389165  | 0.872785  |
| 67 | 6 | 0 | -4.348971 | 1.505380  | 2.871719  |
| 68 | 6 | 0 | -5.212342 | 2.509909  | 2.708542  |
| 69 | 6 | 0 | -4.155463 | 0.151086  | -3.465624 |
| 70 | 6 | 0 | -5.436192 | 0.467427  | -3.263504 |
| 71 | 1 | 0 | -4.738626 | 0.505560  | 3.075961  |
| 72 | 1 | 0 | -6.287222 | 2.362140  | 2.776690  |
| 73 | 1 | 0 | -4.874075 | 3.523731  | 2.501024  |
| 74 | 1 | 0 | -3.920213 | -0.708318 | -4.097840 |
| 75 | 1 | 0 | -6.247019 | -0.101369 | -3.711913 |
| 76 | 1 | 0 | -5.722704 | 1.312446  | -2.639903 |

## E

Standard orientation

| Center<br>Number | Atomic<br>Number | Atomic<br>Type | Coordinates (Angstroms) |           |           |
|------------------|------------------|----------------|-------------------------|-----------|-----------|
|                  |                  |                | X                       | Y         | Z         |
| 1                | 77               | 0              | 0.364734                | -0.026818 | -0.050941 |
| 2                | 15               | 0              | -1.922576               | 0.119879  | -0.048906 |
| 3                | 6                | 0              | 2.512818                | -0.880990 | 0.089801  |
| 4                | 6                | 0              | 1.804901                | -1.403446 | 1.240885  |
| 5                | 6                | 0              | 1.926930                | -1.488080 | -1.085184 |
| 6                | 6                | 0              | 0.774585                | -2.265848 | 0.776374  |
| 7                | 6                | 0              | 0.853586                | -2.321982 | -0.675549 |
| 8                | 6                | 0              | 0.100502                | -3.281485 | -1.554511 |
| 9                | 1                | 0              | 0.638999                | -4.236664 | -1.643780 |
| 10               | 1                | 0              | -0.892161               | -3.512708 | -1.157618 |
| 11               | 1                | 0              | -0.031272               | -2.890528 | -2.568270 |
| 12               | 6                | 0              | -0.116763               | -3.129103 | 1.625934  |
| 13               | 1                | 0              | 0.304033                | -4.137982 | 1.746654  |
| 14               | 1                | 0              | -0.247474               | -2.713490 | 2.630273  |
| 15               | 1                | 0              | -1.113529               | -3.252016 | 1.187269  |
| 16               | 6                | 0              | 2.170171                | -1.140895 | 2.673895  |
| 17               | 1                | 0              | 2.963199                | -1.823389 | 3.010712  |
| 18               | 1                | 0              | 2.535347                | -0.119085 | 2.814425  |
| 19               | 1                | 0              | 1.314674                | -1.277160 | 3.342987  |
| 20               | 6                | 0              | 3.845674                | -0.185893 | 0.117640  |
| 21               | 1                | 0              | 4.668595                | -0.914480 | 0.063961  |
| 22               | 1                | 0              | 3.966177                | 0.501923  | -0.725253 |
| 23               | 1                | 0              | 3.986891                | 0.390420  | 1.036169  |
| 24               | 6                | 0              | 2.460616                | -1.346710 | -2.480696 |
| 25               | 1                | 0              | 3.292905                | -2.044033 | -2.651859 |
| 26               | 1                | 0              | 1.694906                | -1.558532 | -3.233559 |
| 27               | 1                | 0              | 2.837368                | -0.336237 | -2.668510 |
| 28               | 6                | 0              | -2.607292               | -0.264678 | 1.654415  |
| 29               | 6                | 0              | -4.035902               | -0.799116 | 1.826952  |
| 30               | 1                | 0              | -2.463979               | 0.651049  | 2.241405  |

|    |   |   |           |           |           |
|----|---|---|-----------|-----------|-----------|
| 31 | 1 | 0 | -1.899055 | -0.988536 | 2.069357  |
| 32 | 1 | 0 | -4.233795 | -0.990701 | 2.888890  |
| 33 | 1 | 0 | -4.795696 | -0.097586 | 1.473229  |
| 34 | 1 | 0 | -4.178407 | -1.746272 | 1.295722  |
| 35 | 6 | 0 | -2.736419 | -1.100964 | -1.213468 |
| 36 | 6 | 0 | -4.187874 | -0.888995 | -1.667206 |
| 37 | 1 | 0 | -2.078457 | -1.115103 | -2.089618 |
| 38 | 1 | 0 | -4.478631 | -1.685880 | -2.362775 |
| 39 | 1 | 0 | -4.895631 | -0.904915 | -0.834140 |
| 40 | 1 | 0 | -4.310654 | 0.061831  | -2.195969 |
| 41 | 6 | 0 | -2.672730 | 1.770085  | -0.523675 |
| 42 | 6 | 0 | -4.041514 | 2.174155  | 0.040841  |
| 43 | 1 | 0 | -2.696990 | 1.790623  | -1.619749 |
| 44 | 1 | 0 | -1.929069 | 2.515707  | -0.230947 |
| 45 | 1 | 0 | -4.297456 | 3.183253  | -0.304808 |
| 46 | 1 | 0 | -4.845639 | 1.505307  | -0.278501 |
| 47 | 1 | 0 | -4.036556 | 2.199268  | 1.135370  |
| 48 | 6 | 0 | 0.510570  | 1.386346  | -1.647139 |
| 49 | 6 | 0 | 1.497847  | 2.565813  | -1.560928 |
| 50 | 6 | 0 | 1.016247  | 3.741844  | -0.684992 |
| 51 | 6 | 0 | 0.345090  | 1.544979  | 1.402133  |
| 52 | 6 | 0 | 1.610001  | 2.422638  | 1.492816  |
| 53 | 6 | 0 | 1.544224  | 3.773829  | 0.760810  |
| 54 | 1 | 0 | -2.626661 | -2.086532 | -0.745146 |
| 55 | 1 | 0 | 0.797017  | 0.770583  | -2.512459 |
| 56 | 1 | 0 | -0.461904 | 1.816751  | -1.915735 |
| 57 | 1 | 0 | 2.488729  | 2.229482  | -1.225317 |
| 58 | 1 | 0 | 1.649525  | 2.943905  | -2.585470 |
| 59 | 1 | 0 | 1.290864  | 4.694292  | -1.159366 |
| 60 | 1 | 0 | -0.082099 | 3.731472  | -0.674051 |
| 61 | 1 | 0 | 0.919483  | 4.469953  | 1.339969  |
| 62 | 1 | 0 | 2.554532  | 4.209359  | 0.762749  |
| 63 | 1 | 0 | 2.476784  | 1.867247  | 1.123224  |
| 64 | 1 | 0 | 1.831445  | 2.641368  | 2.550456  |
| 65 | 1 | 0 | -0.524346 | 2.211183  | 1.309258  |
| 66 | 1 | 0 | 0.210473  | 1.024622  | 2.362024  |

## F

Standard orientation

| Center<br>Number | Atomic<br>Number | Atomic<br>Type | Coordinates (Angstroms) |           |           |
|------------------|------------------|----------------|-------------------------|-----------|-----------|
|                  |                  |                | X                       | Y         | Z         |
| 1                | 77               | 0              | 0.004518                | 0.374591  | 0.066457  |
| 2                | 15               | 0              | -1.652328               | -1.204511 | -0.001992 |
| 3                | 6                | 0              | 1.077909                | 2.424800  | -0.180175 |
| 4                | 6                | 0              | 0.088798                | 2.361876  | -1.240460 |
| 5                | 6                | 0              | 0.363798                | 2.495507  | 1.069272  |
| 6                | 6                | 0              | -1.199301               | 2.353482  | -0.637301 |
| 7                | 6                | 0              | -1.033988               | 2.434846  | 0.803135  |
| 8                | 6                | 0              | -2.132889               | 2.662080  | 1.804494  |
| 9                | 1                | 0              | -2.319982               | 3.736039  | 1.953678  |
| 10               | 1                | 0              | -3.079116               | 2.216138  | 1.483765  |
| 11               | 1                | 0              | -1.886668               | 2.240282  | 2.784544  |

|    |   |   |           |           |           |
|----|---|---|-----------|-----------|-----------|
| 12 | 6 | 0 | -2.514688 | 2.445265  | -1.359316 |
| 13 | 1 | 0 | -2.848236 | 3.490259  | -1.434553 |
| 14 | 1 | 0 | -2.447784 | 2.055874  | -2.379847 |
| 15 | 1 | 0 | -3.309362 | 1.895209  | -0.843622 |
| 16 | 6 | 0 | 0.375735  | 2.442540  | -2.713167 |
| 17 | 1 | 0 | 0.435259  | 3.488057  | -3.048880 |
| 18 | 1 | 0 | 1.325997  | 1.964340  | -2.966349 |
| 19 | 1 | 0 | -0.404303 | 1.953988  | -3.305906 |
| 20 | 6 | 0 | 2.533366  | 2.759843  | -0.353180 |
| 21 | 1 | 0 | 2.689053  | 3.848419  | -0.312735 |
| 22 | 1 | 0 | 3.152667  | 2.315331  | 0.432977  |
| 23 | 1 | 0 | 2.921381  | 2.412021  | -1.313526 |
| 24 | 6 | 0 | 0.998472  | 2.719915  | 2.410803  |
| 25 | 1 | 0 | 1.170653  | 3.791709  | 2.583066  |
| 26 | 1 | 0 | 0.367151  | 2.355067  | 3.226781  |
| 27 | 1 | 0 | 1.965749  | 2.214247  | 2.488208  |
| 28 | 6 | 0 | -2.387504 | -1.322295 | -1.723134 |
| 29 | 6 | 0 | -3.829587 | -1.804894 | -1.930564 |
| 30 | 1 | 0 | -1.686966 | -1.940643 | -2.298008 |
| 31 | 1 | 0 | -2.283869 | -0.310906 | -2.128917 |
| 32 | 1 | 0 | -4.078665 | -1.780108 | -2.998704 |
| 33 | 1 | 0 | -3.987612 | -2.828262 | -1.580728 |
| 34 | 1 | 0 | -4.548200 | -1.157962 | -1.416046 |
| 35 | 6 | 0 | -3.075004 | -0.788494 | 1.141121  |
| 36 | 6 | 0 | -4.078048 | -1.873635 | 1.558958  |
| 37 | 1 | 0 | -2.585754 | -0.380697 | 2.032590  |
| 38 | 1 | 0 | -4.806202 | -1.453611 | 2.263745  |
| 39 | 1 | 0 | -4.637376 | -2.279873 | 0.711990  |
| 40 | 1 | 0 | -3.581603 | -2.707579 | 2.065909  |
| 41 | 6 | 0 | -1.198596 | -2.961619 | 0.466051  |
| 42 | 6 | 0 | -1.975336 | -4.134799 | -0.147648 |
| 43 | 1 | 0 | -1.250695 | -3.008468 | 1.560086  |
| 44 | 1 | 0 | -0.139089 | -3.063152 | 0.218391  |
| 45 | 1 | 0 | -1.541936 | -5.081377 | 0.197767  |
| 46 | 1 | 0 | -3.032169 | -4.137409 | 0.134153  |
| 47 | 1 | 0 | -1.916729 | -4.132999 | -1.240991 |
| 48 | 6 | 0 | 0.895133  | -0.621352 | 1.757653  |
| 49 | 6 | 0 | 2.412829  | -0.907064 | 1.763103  |
| 50 | 6 | 0 | 2.760525  | -2.314010 | 1.239356  |
| 51 | 6 | 0 | 1.088131  | -0.856634 | -1.317768 |
| 52 | 6 | 0 | 2.570673  | -0.478505 | -1.565053 |
| 53 | 6 | 0 | 3.605872  | -1.640448 | -1.677359 |
| 54 | 1 | 0 | -3.598682 | 0.056714  | 0.678176  |
| 55 | 6 | 0 | 4.616899  | -1.714764 | -0.506380 |
| 56 | 6 | 0 | 4.190648  | -2.540459 | 0.726959  |
| 57 | 1 | 0 | 0.660685  | 0.056405  | 2.589672  |
| 58 | 1 | 0 | 0.386147  | -1.561374 | 2.004301  |
| 59 | 1 | 0 | 2.799497  | -0.822831 | 2.792720  |
| 60 | 1 | 0 | 2.949421  | -0.141375 | 1.191818  |
| 61 | 1 | 0 | 2.557255  | -3.040880 | 2.039666  |
| 62 | 1 | 0 | 2.071208  | -2.572291 | 0.431488  |
| 63 | 1 | 0 | 4.913490  | -2.356982 | 1.535789  |
| 64 | 1 | 0 | 4.287319  | -3.607182 | 0.475581  |
| 65 | 1 | 0 | 3.089399  | -2.604694 | -1.789146 |
| 66 | 1 | 0 | 4.182297  | -1.509227 | -2.602585 |
| 67 | 1 | 0 | 2.922853  | 0.190577  | -0.778601 |
| 68 | 1 | 0 | 2.623209  | 0.115873  | -2.487347 |



|    |   |   |          |           |           |
|----|---|---|----------|-----------|-----------|
| 69 | 1 | 0 | 1.039247 | -1.910004 | -1.024875 |
| 70 | 1 | 0 | 0.551319 | -0.796976 | -2.276636 |
| 71 | 1 | 0 | 4.863519 | -0.688574 | -0.200341 |
| 72 | 1 | 0 | 5.560152 | -2.144043 | -0.872204 |

## G

Standard orientation

| Center<br>Number | Atomic<br>Number | Atomic<br>Type | Coordinates (Angstroms) |           |           |
|------------------|------------------|----------------|-------------------------|-----------|-----------|
|                  |                  |                | X                       | Y         | Z         |
| 1                | 77               | 0              | -0.108679               | 0.312918  | 0.052638  |
| 2                | 15               | 0              | -1.504516               | -1.391223 | -0.052127 |
| 3                | 6                | 0              | 0.585792                | 2.530370  | -0.147581 |
| 4                | 6                | 0              | -0.324427               | 2.275036  | -1.248184 |
| 5                | 6                | 0              | -0.180858               | 2.459172  | 1.074198  |
| 6                | 6                | 0              | -1.608902               | 2.001851  | -0.697959 |
| 7                | 6                | 0              | -1.524119               | 2.120095  | 0.749517  |
| 8                | 6                | 0              | -2.685112               | 2.050926  | 1.700427  |
| 9                | 1                | 0              | -3.228032               | 3.006702  | 1.735183  |
| 10               | 1                | 0              | -3.394128               | 1.273455  | 1.405573  |
| 11               | 1                | 0              | -2.353974               | 1.827108  | 2.719380  |
| 12               | 6                | 0              | -2.876470               | 1.782860  | -1.477024 |
| 13               | 1                | 0              | -3.376081               | 2.739392  | -1.687179 |
| 14               | 1                | 0              | -2.677800               | 1.295213  | -2.435814 |
| 15               | 1                | 0              | -3.582251               | 1.155977  | -0.925416 |
| 16               | 6                | 0              | -0.004523               | 2.404725  | -2.710033 |
| 17               | 1                | 0              | -0.181709               | 3.430934  | -3.062973 |
| 18               | 1                | 0              | 1.040989                | 2.161927  | -2.916130 |
| 19               | 1                | 0              | -0.623496               | 1.736812  | -3.316986 |
| 20               | 6                | 0              | 1.958010                | 3.133895  | -0.260501 |
| 21               | 1                | 0              | 1.907030                | 4.229857  | -0.180460 |
| 22               | 1                | 0              | 2.629166                | 2.782607  | 0.530224  |
| 23               | 1                | 0              | 2.427127                | 2.899750  | -1.219088 |
| 24               | 6                | 0              | 0.346983                | 2.789546  | 2.439468  |
| 25               | 1                | 0              | 0.290559                | 3.871460  | 2.624318  |
| 26               | 1                | 0              | -0.224527               | 2.292138  | 3.228783  |
| 27               | 1                | 0              | 1.393929                | 2.491614  | 2.549545  |
| 28               | 6                | 0              | -2.933511               | -2.711281 | -1.909196 |
| 29               | 1                | 0              | -2.901183               | -2.875006 | -2.988603 |
| 30               | 1                | 0              | -2.813254               | -3.670707 | -1.393452 |
| 31               | 1                | 0              | -3.896591               | -2.268937 | -1.634813 |
| 32               | 6                | 0              | -3.670975               | -1.928404 | 1.526017  |
| 33               | 1                | 0              | -4.612860               | -1.421086 | 1.749035  |
| 34               | 1                | 0              | -3.877007               | -2.923937 | 1.121837  |
| 35               | 1                | 0              | -3.085166               | -2.032128 | 2.443846  |
| 36               | 6                | 0              | -0.247550               | -3.762361 | 0.239963  |
| 37               | 1                | 0              | 0.721273                | -3.465282 | 0.648183  |
| 38               | 1                | 0              | -0.519429               | -4.746679 | 0.630683  |
| 39               | 1                | 0              | -0.185551               | -3.809093 | -0.852160 |
| 40               | 6                | 0              | 0.936734                | -0.533476 | 1.736564  |
| 41               | 6                | 0              | 2.480190                | -0.473101 | 1.761788  |
| 42               | 6                | 0              | 3.145369                | -1.784489 | 1.299229  |
| 43               | 6                | 0              | 1.208859                | -0.740485 | -1.285529 |

|    |   |   |           |           |           |
|----|---|---|-----------|-----------|-----------|
| 44 | 6 | 0 | 2.574681  | -0.071791 | -1.578245 |
| 45 | 6 | 0 | 3.831917  | -0.994130 | -1.637800 |
| 46 | 6 | 0 | 4.823306  | -0.817084 | -0.460046 |
| 47 | 6 | 0 | 4.590902  | -1.693110 | 0.790642  |
| 48 | 1 | 0 | 0.540745  | 0.041262  | 2.584318  |
| 49 | 1 | 0 | 0.626433  | -1.568482 | 1.918550  |
| 50 | 1 | 0 | 2.825208  | -0.260176 | 2.786998  |
| 51 | 1 | 0 | 2.841098  | 0.366501  | 1.157710  |
| 52 | 1 | 0 | 3.110636  | -2.504211 | 2.130615  |
| 53 | 1 | 0 | 2.540579  | -2.229366 | 0.504354  |
| 54 | 1 | 0 | 5.250407  | -1.332651 | 1.593945  |
| 55 | 1 | 0 | 4.928160  | -2.715136 | 0.562700  |
| 56 | 1 | 0 | 3.529939  | -2.047961 | -1.722394 |
| 57 | 1 | 0 | 4.380564  | -0.773713 | -2.562909 |
| 58 | 1 | 0 | 2.785213  | 0.706236  | -0.841965 |
| 59 | 1 | 0 | 2.494540  | 0.458376  | -2.536875 |
| 60 | 1 | 0 | 1.377234  | -1.754207 | -0.915529 |
| 61 | 1 | 0 | 0.656334  | -0.857423 | -2.226297 |
| 62 | 1 | 0 | 4.830196  | 0.244004  | -0.174284 |
| 63 | 1 | 0 | 5.841603  | -1.028676 | -0.814765 |
| 64 | 8 | 0 | -1.861065 | -1.812431 | -1.601139 |
| 65 | 8 | 0 | -1.274687 | -2.859687 | 0.664336  |
| 66 | 8 | 0 | -2.996454 | -1.101060 | 0.571404  |

## H

Standard orientation

| Center<br>Number | Atomic<br>Number | Atomic<br>Type | Coordinates (Angstroms) |           |           |
|------------------|------------------|----------------|-------------------------|-----------|-----------|
|                  |                  |                | X                       | Y         | Z         |
| 1                | 77               | 0              | 0.727139                | -0.654089 | -0.099848 |
| 2                | 15               | 0              | -1.270221               | 0.465615  | 0.043684  |
| 3                | 6                | 0              | 2.251597                | -2.336347 | -0.430930 |
| 4                | 6                | 0              | 1.746374                | -2.562077 | 0.904851  |
| 5                | 6                | 0              | 1.166451                | -2.624716 | -1.354214 |
| 6                | 6                | 0              | 0.369233                | -2.901087 | 0.814306  |
| 7                | 6                | 0              | 0.010135                | -2.935346 | -0.590723 |
| 8                | 6                | 0              | -1.317442               | -3.413890 | -1.109367 |
| 9                | 1                | 0              | -1.381152               | -4.510111 | -1.055053 |
| 10               | 1                | 0              | -2.149916               | -3.012525 | -0.522579 |
| 11               | 1                | 0              | -1.480232               | -3.129263 | -2.152182 |
| 12               | 6                | 0              | -0.488902               | -3.403250 | 1.938853  |
| 13               | 1                | 0              | -0.396331               | -4.495311 | 2.040660  |
| 14               | 1                | 0              | -0.198394               | -2.965021 | 2.898455  |
| 15               | 1                | 0              | -1.547348               | -3.180013 | 1.782826  |
| 16               | 6                | 0              | 2.562852                | -2.620287 | 2.164024  |
| 17               | 1                | 0              | 2.807768                | -3.664176 | 2.407389  |
| 18               | 1                | 0              | 3.504355                | -2.077136 | 2.066117  |
| 19               | 1                | 0              | 2.023500                | -2.204110 | 3.020813  |
| 20               | 6                | 0              | 3.698053                | -2.229558 | -0.825972 |
| 21               | 1                | 0              | 4.136341                | -3.225411 | -0.989471 |
| 22               | 1                | 0              | 3.822815                | -1.661767 | -1.752874 |
| 23               | 1                | 0              | 4.296258                | -1.734439 | -0.055956 |
| 24               | 6                | 0              | 1.317540                | -2.731728 | -2.843530 |

|    |   |   |           |           |           |
|----|---|---|-----------|-----------|-----------|
| 25 | 1 | 0 | 1.797730  | -3.681938 | -3.117031 |
| 26 | 1 | 0 | 0.352016  | -2.697923 | -3.358070 |
| 27 | 1 | 0 | 1.940000  | -1.928790 | -3.252246 |
| 28 | 6 | 0 | 1.342862  | 0.628147  | -1.723411 |
| 29 | 6 | 0 | 2.731795  | 1.298627  | -1.688077 |
| 30 | 6 | 0 | 2.706049  | 2.740343  | -1.147900 |
| 31 | 6 | 0 | 1.527138  | 0.755199  | 1.311682  |
| 32 | 6 | 0 | 3.050432  | 0.720275  | 1.597734  |
| 33 | 6 | 0 | 3.774882  | 2.095098  | 1.736272  |
| 34 | 6 | 0 | 4.684413  | 2.497189  | 0.548796  |
| 35 | 6 | 0 | 4.034792  | 3.287357  | -0.607421 |
| 36 | 1 | 0 | 1.298071  | -0.037298 | -2.595141 |
| 37 | 1 | 0 | 0.599058  | 1.406103  | -1.929559 |
| 38 | 1 | 0 | 3.150838  | 1.324737  | -2.708018 |
| 39 | 1 | 0 | 3.431054  | 0.691019  | -1.107244 |
| 40 | 1 | 0 | 2.351493  | 3.409349  | -1.946286 |
| 41 | 1 | 0 | 1.956225  | 2.817294  | -0.356976 |
| 42 | 1 | 0 | 4.768742  | 3.362439  | -1.423817 |
| 43 | 1 | 0 | 3.859194  | 4.318615  | -0.266973 |
| 44 | 1 | 0 | 3.042161  | 2.890018  | 1.935057  |
| 45 | 1 | 0 | 4.412134  | 2.055039  | 2.629879  |
| 46 | 1 | 0 | 3.579295  | 0.143255  | 0.832658  |
| 47 | 1 | 0 | 3.207188  | 0.165277  | 2.530539  |
| 48 | 1 | 0 | 1.239381  | 1.762243  | 1.009758  |
| 49 | 1 | 0 | 1.002848  | 0.582470  | 2.264644  |
| 50 | 1 | 0 | 5.160882  | 1.588135  | 0.155931  |
| 51 | 1 | 0 | 5.509937  | 3.113842  | 0.931049  |
| 52 | 6 | 0 | -2.265650 | 0.579416  | -1.523227 |
| 53 | 6 | 0 | -3.405335 | 1.397917  | -1.619098 |
| 54 | 6 | 0 | -1.878947 | -0.163450 | -2.645208 |
| 55 | 6 | 0 | -4.143902 | 1.453821  | -2.800990 |
| 56 | 1 | 0 | -3.714071 | 1.998385  | -0.768536 |
| 57 | 6 | 0 | -2.615184 | -0.105033 | -3.831541 |
| 58 | 1 | 0 | -0.984477 | -0.773008 | -2.583842 |
| 59 | 6 | 0 | -3.750731 | 0.700751  | -3.910949 |
| 60 | 1 | 0 | -5.023066 | 2.090433  | -2.857399 |
| 61 | 1 | 0 | -2.294588 | -0.683451 | -4.694167 |
| 62 | 1 | 0 | -4.323407 | 0.749797  | -4.833418 |
| 63 | 6 | 0 | -1.301190 | 2.260375  | 0.561927  |
| 64 | 6 | 0 | -0.959502 | 3.246171  | -0.381319 |
| 65 | 6 | 0 | -1.609634 | 2.673703  | 1.866228  |
| 66 | 6 | 0 | -0.920867 | 4.594915  | -0.029030 |
| 67 | 1 | 0 | -0.732011 | 2.965289  | -1.403831 |
| 68 | 6 | 0 | -1.571676 | 4.025171  | 2.218906  |
| 69 | 1 | 0 | -1.897716 | 1.947406  | 2.617038  |
| 70 | 6 | 0 | -1.224601 | 4.990809  | 1.274995  |
| 71 | 1 | 0 | -0.654014 | 5.336084  | -0.777769 |
| 72 | 1 | 0 | -1.820106 | 4.318701  | 3.235558  |
| 73 | 1 | 0 | -1.196244 | 6.041912  | 1.549577  |
| 74 | 6 | 0 | -2.460596 | -0.307438 | 1.246095  |
| 75 | 6 | 0 | -2.023281 | -0.522842 | 2.565655  |
| 76 | 6 | 0 | -3.762359 | -0.704033 | 0.904415  |
| 77 | 6 | 0 | -2.876350 | -1.071037 | 3.523459  |
| 78 | 1 | 0 | -1.002049 | -0.273000 | 2.838745  |
| 79 | 6 | 0 | -4.607566 | -1.278899 | 1.858452  |
| 80 | 1 | 0 | -4.126283 | -0.565398 | -0.107358 |
| 81 | 6 | 0 | -4.173759 | -1.452181 | 3.172365  |

|    |   |   |           |           |          |
|----|---|---|-----------|-----------|----------|
| 82 | 1 | 0 | -2.521342 | -1.215463 | 4.540579 |
| 83 | 1 | 0 | -5.609933 | -1.584685 | 1.569868 |
| 84 | 1 | 0 | -4.835725 | -1.889500 | 3.914998 |
